# Supplementary material
Source: Elsevier journal article supplement (https://www.sciencedirect.com/science/article/pii/S253006441830066X)
Supplement: mmc1 [file S253006441830066X:mmc1.docx]

**Table S1 –** Home range size and dispersal distance values for all species on which data was collected.

| Species | Mean Home Range Size (ha) | Maximum Dispersal Distance (m) | References |
| --- | --- | --- | --- |
| *Akodon cursor* | - | 335 | Pires et al. (2002) |
| *Ara severa* | - | 425 | Lees and Peres (2009) |
| *Aratinga leucophthalmus* | - | 425 | Lees and Peres (2009) |
| Arremon flavirostris | - | 650 | Marini (2010) |
| h | - | 150 | Marini (2010) |
| *Basileuterus culicivorus* | - | 54 | Awade and Metzger (2008) |
| Basileuterus flaveolus | 2.0 | 150 | Duca and Marini (2005); Marini (2010) |
| Basileuterus hypoleucus | - | 150 | Marini (2010) |
| *Batara cinerea* | - | 60 | Uezu et al. (2005) |
| Caluromys philander | 4.3 | 60 | Lira et al. (2007); Viveiros de Castro and Fernandez (2004) |
| *Campylorhynchus turdinus* | - | 75 | Lees and Peres (2009) |
| Chiroxiphia caudata | 4.6 | 650 | Hansbauer et al. (2008); Marini (2010) |
| Cnemotriccus fuscatus | - | 100 | Marini (2010) |
| *Conopophaga lineata* | - | 12 | de Oliveira et al. (2011) |
| *Dryocopus lineatus* | - | 425 | Lees and Peres (2009) |
| Dysithamnus mentalis | 0.7 | 650 | Duca et al. (2006); Marini (2010) |
| Euglossa cordata | - | 1340 | Tonhasca Jr et al. (2003) |
| Euglossa sapphirina | - | 1340 | Tonhasca Jr et al. (2003) |
| Euglossa securigera | - | 440 | Tonhasca Jr et al. (2003) |
| Eulaema nigrita | - | 440 | Tonhasca Jr et al. (2003) |
| *Formicarius colma* | 7.0 | 50 | Johnson et al. (2011); Laurance and Gomez (2005); Stouffer (2007) |
| *Geotrygon montana* | - | 30 | Laurance et al. (2004) |
| *Glyphorynchus spirurus* | 5.2 | 30 | Johnson et al. (2011); Laurance et al. (2004) |
| Ilicura militaris | - | 150 | Marini (2010) |
| Lathrotriccus euleri | - | 650 | Marini (2010) |
| Leptopogon amaurocephalus | - | 200 | Marini (2010) |
| *Micoureus demerarae* | 1.4 | 800 | Lira et al. (2007); Pires et al. (2002); Pires et al. (1999); Pires and Fernandez (1999); Junior and Chiarello (2005) |
| Micoureus paraguayanus | - | 100 | Forero-Medina and Vieira (2008) |
| Mionectes rufiventris | - | 150 | Marini (2010) |
| *Myiobius barbatus* | - | 30 | Laurance et al. (2004) |
| *Myrmotherula axillaris* | 8.9 | 30 | Johnson et al. (2011); Laurance et al. (2004) |
| *Phaethornis ruber* | - | 425 | Lees and Peres (2009) |
| Philander frenatus | 2.8 | 1050 | Lira et al. (2007); Prevedello et al. (2009) |
| Phylloscartes ventralis | - | 150 | Marini (2010) |
| *Piaya cayana* | - | 75 | Lees and Peres (2009) |
| *Pionus menstruus* | - | 425 | Lees and Peres (2009) |
| *Pipra pipra* | - | 30 | Laurance et al. (2004) |
| Platyrinchus mystaceus | - | 650 | Marini (2010) |
| *Popelairia langsdorffi* | - | 7 | Lees and Peres (2009) |
| *Pyriglena leucoptera* | 8.1 | 60 | Duca et al. (2006); Hansbauer et al. (2008); Uezu et al. (2005) |
| Sclerurus scansor | 7.2 | 150 | Hansbauer et al. (2008); Marini (2010) |
| Sittasomus griseicapillus | 36.7 | 200 | Johnson et al. (2011); Marini (2010) |
| Tachyphonus coronatus | - | 150 | Marini (2010) |
| *Tachyphonus cristatus* | 8.2 | 30 | Johnson et al. (2011); Laurance et al. (2004) |
| *Thamnomanes caesius* | 10.6 | 50 | Johnson et al. (2011); Laurance and Gomez (2005) |
| *Thamnophilus aethiops* | - | 7 | Lees and Peres (2009) |
| *Thamnophilus caerulescens* | 1.0 | 60 | Awade and Metzger (2008); Duca et al. (2006) |
| Tolmomyias sulphurescens | - | 50 | Marini (2010) |
| Trichothraupis melanops | - | 650 | Marini (2010) |
| *Trogon surrucura* | - | 10 | Uezu et al. (2005) |
| *Trogon viridis* | 17.5 | 12 | Johnson et al. (2011); Lees and Peres (2009) |
| *Turdus albicollis* | 27.3 | 30 | Johnson et al. (2011); Laurance et al. (2004) |
| *Xiphorhynchus fuscus* | - | 145 | Boscolo et al. (2008) |
| *Xiphorhynchus guttatus* | - | 12 | Lees and Peres (2009) |

**References**

Awade, M., Metzger, J. P., 2008. Using gap-crossing capacity to evaluate functional connectivity of two Atlantic rainforest birds and their response to fragmentation. Austral Ecology 33, 863-871.

Boscolo, D., Candia-Gallardo, C., Awade, M., Metzger, J. P., 2008. Importance of interhabitat gaps and stepping-stones for lesser woodcreepers (Xiphorhynchus fuscus) in the Atlantic forest, Brazil. Biotropica 40, 273-276.

de Oliveira, P. R. R., Alberts, C. C., Francisco, M. R., 2011. Impact of road clearings on the movements of three understory insectivorous bird species in the Brazilian Atlantic Forest. Biotropica 43, 628-632.

Duca, C., Guerra, T. J., Marini, M. A., 2006. Territory size of three Antbirds (Aves, Passeriformes) in an Atlantic Forest fragment in southeastern Brazil. Revista Brasileira De Zoologia 23, 692-698.

Duca, C., Marini, M. A., 2005. Territory size of the flavescent warbler, *Basileuterus flaveolus* (Passeriformes, Emberizidae), in a forest fragment in Southeastern Brazil. Lundiana 6, 29-33.

Forero-Medina, G., Vieira, M. V., 2008. Perception of a fragmented landscape by neotropical marsupials: effects of body mass and environmental variables. Journal of Tropical Ecology 25, 53-62.

Hansbauer, M. M., Storch, I., Pimentel, R. G., Metzger, J. P., 2008. Comparative range use by three Atlantic Forest understorey bird species in relation to forest fragmentation. Journal of Tropical Ecology 24, 291-299.

Johnson, E. I., Stouffer, P. C., Vargas, C. F., 2011. Diversity, biomass, and trophic structure of a central amazonian rainforest bird community. Revista Brasileira De Ornitologia 19, 1-16.

Junior, E. A. M., Chiarello, A. G., 2005. A radio tracking study of home range and movements of the marsupial *Micoureus demerarae* (Thomas) (Mammalia, Didelphidae) in the Atlantic forest of south-eastern Brazil. Revista Brasileira De Zoologia 22, 85-91.

Laurance, S. G. W., Gomez, M. S., 2005. Clearing width and movements of understory rainforest birds. Biotropica 37, 149-152.

Laurance, S. G. W., Stouffer, P. C., Laurance, W. E., 2004. Effects of road clearings on movement patterns of understory rainforest birds in central Amazonia. Conservation Biology 18, 1099-1109.

Lees, A. C., Peres, C. A., 2009. Gap-crossing movements predict species occupancy in Amazonian forest fragments. Oikos 118, 280-290.

Lira, P. K., Fernandez, F. A. d. S., Carlos, H. S. A., Curzio, P. d. L., 2007. Use of a fragmented landscape by three species of opossum in south-eastern Brazil. Journal of Tropical Ecology 23, 427-435.

Marini, M. A., 2010. Bird movement in a fragmented Atlantic Forest landscape. Studies on Neotropical Fauna and Environment 45, 1-10.

Pires, A., Fernandes, F. A. S., Freitas, D., 1999. Patterns of space use by Micoureus demerarae (Marsupialia: Didelphidae) in a fragment of Atlantic forest in Brazil. Mastozoología Neotropical 6, 39-45.

Pires, A., Fernandez, F. A. S., 1999. Use of space by the marsupial Micoureus demerarae in small Atlantic Forest fragments in south-eastern Brazil. Journal of Tropical Ecology 15, 279-290.

Pires, A. S., Lira, P. K., Fernandez, F. A. S., Schittini, G. M., Oliveira, L. C., 2002. Frequency of movements of small mammals among Atlantic Coastal Forest fragments in Brazil. Biological Conservation 108, 229-237.

Prevedello, J. A., Delciellos, A. C., Vieira, M. V., 2009. Homing behavoiur of *Philander frenatus* across a fragmented landscape in the Atlantic Forest of Brazil. Mastozoología Neotropical 16, 475-480.

Stouffer, P. C. 2007. Density, territory size, and long-term spatial dynamics of a guild of terrestrial insectivorous birds near Manaus, Brazil. The Auk 124, 291-306.

Tonhasca Jr, A., Albuquerque, G. S, Blackmer, J. L., 2003. Dispersal of euglossine bees between fragments of the Brazilian Atlantic Forest. Journal of Tropical Ecology 19, 99-102.

Uezu, A., Metzger, J. P., Vielliard, J. M. E., 2005. Effects of structural and functional connectivity and patch size on the abundance of seven Atlantic Forest bird species. Biological Conservation 123, 507-519.

Viveiros de Castro, E. B., Fernandez, F. A. S., 2004. Determinants of differential extinction vulnerabilities of small mammals in Atlantic forest fragments in Brazil. Biological Conservation 119, 73-80.
